# Supplementary material
Source: PubMed Central journal article supplement (PMC8725060)
Supplement: NIHMS1765893-supplement-1.pdf [file NIHMS1765893-supplement-1.pdf]

## Suppl Table

Genes in the PharmVar database ('PharmVar Genes') have been extensively curated before or after their transition into the PharmVar database or have been transitioned with limited curation. Several genes are still awaiting curation before being transitioned.

| PharmVar Genes                                                                                     | In PharmVar database<br>(yes/no/pending/legacy<br>status) | Gene curated<br>(yes/no/limited/pending) | Core alleles defined<br>and available in CAVE<br>(yes/no/pending) |
|----------------------------------------------------------------------------------------------------|-----------------------------------------------------------|------------------------------------------|-------------------------------------------------------------------|
| <i>CYP2A6</i>                                                                                      | pending <sup>1</sup>                                      | pending <sup>1</sup>                     | pending <sup>1</sup>                                              |
| <i>CYP2A7</i>                                                                                      | yes                                                       | limited                                  | no                                                                |
| <i>CYP2A13</i>                                                                                     | yes                                                       | limited                                  | yes                                                               |
| <i>CYP2B6</i> <sup>2</sup>                                                                         | yes                                                       | yes                                      | yes                                                               |
| <i>CYP2C8</i>                                                                                      | yes                                                       | yes                                      | yes                                                               |
| <i>CYP2C9</i> <sup>2</sup>                                                                         | yes                                                       | yes                                      | yes                                                               |
| <i>CYP2C19</i> <sup>2</sup>                                                                        | yes                                                       | yes                                      | yes                                                               |
| <i>CYP2D6</i> <sup>2</sup>                                                                         | yes                                                       | yes                                      | yes                                                               |
| <i>CYPs 2F1, 2J2, 2R1, 2S1, 2W1</i>                                                                | yes                                                       | limited                                  | no                                                                |
| <i>CYP3A4</i>                                                                                      | yes                                                       | yes                                      | yes                                                               |
| <i>CYP3A5</i> <sup>2</sup>                                                                         | yes                                                       | yes                                      | yes                                                               |
| <i>CYP3A7</i>                                                                                      | yes                                                       | limited                                  | no                                                                |
| <i>CYP3A43</i>                                                                                     | yes                                                       | limited                                  | no                                                                |
| <i>CYP4F2</i>                                                                                      | yes                                                       | limited                                  | no                                                                |
| <i>CYP1A1, CYP1A2, CYP1B1, CYP2E1</i>                                                              | no <sup>3</sup>                                           | no                                       | no                                                                |
| <i>DPYD</i>                                                                                        | yes                                                       | yes                                      | n/a <sup>4</sup>                                                  |
| <i>NUDT15</i>                                                                                      | yes                                                       | yes                                      | pending                                                           |
| <i>SLCO1B1</i>                                                                                     | pending <sup>1</sup>                                      | pending <sup>1</sup>                     | pending <sup>1</sup>                                              |
| <i>TBXAS1, PTGIS, POR, CYP4A11,<br/>CYP4A22, CYP4B1, CYP17A1,<br/>CYP19A1, CYP21A2 and CYP26A1</i> | legacy status                                             | legacy status                            | legacy status                                                     |

No curations indicates that no changes have been made since the [Human Cytochrome P450 \(CYP\) Allele Nomenclature Database has been transitioned to PharmVar](#); limited curation denotes that no extensive literature search has been performed since the transition or any new data been obtained or submitted to PharmVar; the [Comparative Allele Viewer \(CAVE\)](#) is a PharmVar-developed tool to compare core

alleles graphically (more info and examples please see the Read Me document provided for each each); legacy status indicates that these genes were previously maintained by the Human Cytochrome P450 (CYP) Allele Nomenclature Database but are currently not supported by PharmVar.

<sup>1</sup> *CYP2A6* is anticipated to be completed and transitioned into the PharmVar database in fall 2021 and *SLCO1B1* is projected to be introduced to PharmVar in summer 2021.

<sup>2</sup> GeneFocus Review published for *CYP2B6*, *CYP2C19* and *CYP2D6* (1-3), submitted (*CYP2C9*) or in preparation (*CYP3A5*) describing extensive curation efforts for respective genes.

<sup>3</sup> Star allele definitions of these will require extensive curation and likely also major revisions for star allele designations to align them with current PharmVar rules and standards.

<sup>4</sup> *DPYD* variation is not haplotype-based and thus, nomenclature is not using star nomenclature; therefore, there are no core allele definitions. Rather, *DPYD* variation is displayed using rsID.
